# Supplementary material for: Mechanical and optical properties of the femoral chordotonal organ in beetles (Coleoptera)
Source: Oxford University Press journal article supplement (doi:10.1242/jeb.203968), 2019-01-01
Supplement: jeb203968supp.pdf [file jeb203968supp.pdf]

## Supplementary materials

**Table S1.** Mechanical parameters of arcula in separated legs of some beetles\*.

| Family      | Species                             | shape of the arculum | Time constant, s | Max. angular amplification |
|-------------|-------------------------------------|----------------------|------------------|----------------------------|
| Carabidae   | <i>Cicindela hybrida</i> L.         | straight             | ?                | >1                         |
|             | <i>Carabus cancellatus</i> Ill.     | straight             | ?                | 7.3                        |
| Dytiscidae  | <i>Dytiscus marginalis</i> L.       | straight             | –                | –                          |
| Geotrupidae | <i>Geotrupes stercorarius</i> L.,   | curved               | 1.24             | 5.8                        |
|             | <i>Geotrupes stercorosus</i> Scriba | curved               | 0.945            | 6.3                        |
|             | <i>Lethrus apterus</i> Laxm.        | curved               | 0.435            | 28.3                       |
| Buprestidae | <i>Chalcophora mariana</i> L.       | curved               | 1.95             | 7.2                        |

\*Parameters in *Cicindela hybrida* were not measured because of the small size of this beetle. In *Dytiscus marginalis*, a triangular sclerite, connected to a ligament, was immobile.

**Fig. S1.**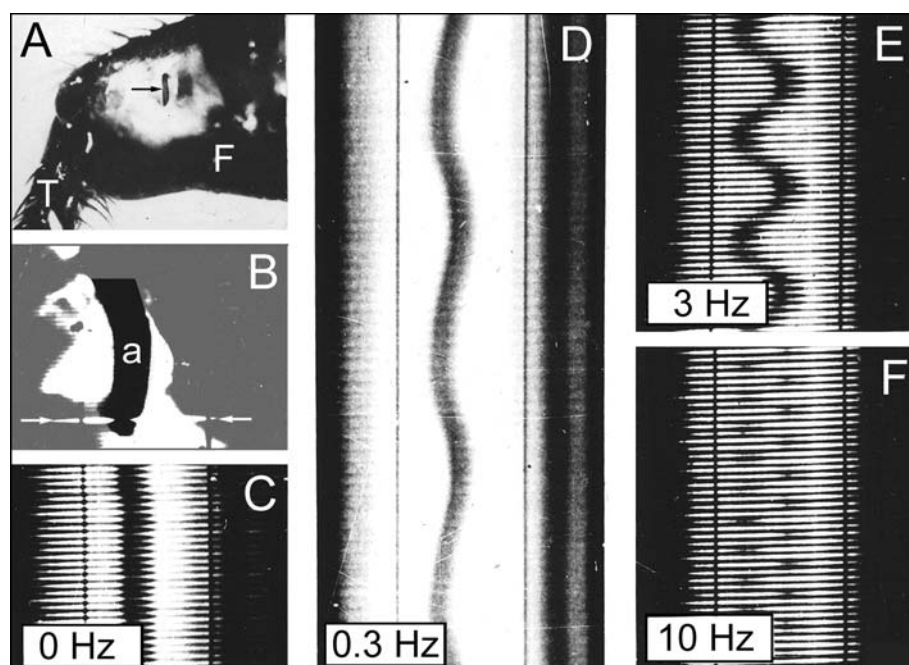

**Video kymography of the oscillating arculum** responding to small oscillations of the tibia. (A) The arculum (indicated with a small arrow) is exposed in a window cut in the anterior face of the femur in *Geotrupes stercorosus*. (B) Video image of a window with the arculum (highlighted as the contrast black element against the low contrast background) in *Lethrus apterus*. Position of the slit across the tip of the arculum is indicated with two white arrows. This image in the slit was recorded on the running film. (C-F) Records of oscillations in *L. apterus* on the running film. Amplitude of imposed oscillations in the arculum is moderate at 0.3 Hz, but larger at 3-10 Hz. Abbreviations: a arculum, F femur, T tibia.

**Table S2.** List of recently inspected beetle species [families classified by Lawrence et al., 2011\*].

| Higher taxa               | Family        | Species                                      |
|---------------------------|---------------|----------------------------------------------|
| Archostemmata             | Cupedidae     | <i>Priacma serrata</i> (Leconte, 1861)       |
| Adephaga                  | Carabidae     | <i>Carabus glabratus</i> Paykull, 1790       |
|                           |               | <i>Calosoma inquisitor</i> (Linnaeus, 1758); |
|                           |               | <i>Anthia mannerheimi</i> Chaudoir, 1842     |
| Polyphaga, Hydrophiloidea | Hydrophilidae | <i>Hydrous piceus</i> (Linnaeus, 1758)       |
| Polyphaga, Scarabaeoidea  | Geotrupidae   | <i>Lethrus apterus</i> Laxmann, 1770         |
|                           | Lucanidae     | <i>Lucanus cervus</i> Linnaeus, 1758         |
|                           | Scarabaeidae  | <i>Melolontha melolontha</i> Linnaeus, 1775  |
|                           |               | <i>Pentodon idiota</i> Herbst, 1789          |
|                           |               | <i>Allomyrina dichotoma</i> (Linnaeus, 1771) |
|                           |               | <i>Megasoma elephas</i> Fabricius, 1775      |
| Polyphaga, Buprestoidea   | Buprestidae   | <i>Chalcophora mariana</i> (Linnaeus, 1758)  |
| Polyphaga, Tenebrionoidea | Tenebrionidae | <i>Zophobas atratus</i> (Fabricius, 1775)    |
|                           | Meloidae      | <i>Meloë proscarabaeus</i> Linnaeus, 1758    |
| Polyphaga, Chrysomeloidea | Cerambycidae  | <i>Prionus coriarius</i> Linnaeus, 1758      |

\* Lawrence, J. F., Ślipiński, A., Seago, A. E., Thayer, M. K., Newton, A. F. and Marvaldi, A. E., 2011. Phylogeny of the Coleoptera based on morphological characters of adults and larvae. *Annales Zoologici* (Warszawa) 61, 1-217.

**Fig. S2.**

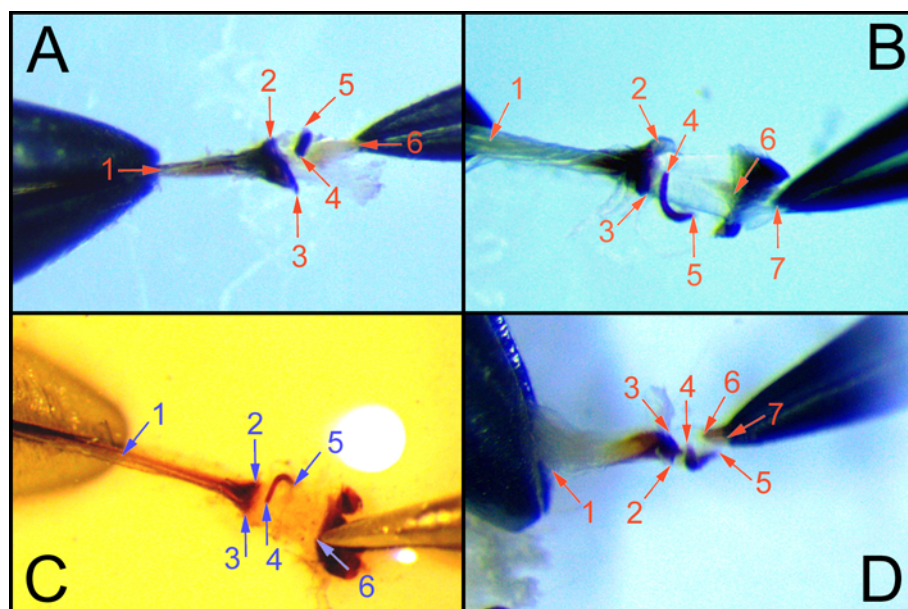

**Relevant points for measurements of arculum oscillations in video frames.** (A) *Calosoma inquisitor*, (B, C) *Lethrus apterus*, (D) *Chalcophora mariana*. Points are indicated by arrows. Location of points: 1 – grip of the left forceps; 2, 3 – markers at the edge of the cup; 4, 5 – base and tip of the arculum; 6 in A, C; 7 in B, D – grip of the right forceps by the tibial ledge; 6 in B, D – distal edge of the tendon. View image at magnification 200% for details.

**Table S3.** Correlation between frame by frame deviations from mean projections onto the line between two grips (forceps1 – forceps2) for pairs of relevant points.

| Genus              | AVI file *         | D.O.F | Correlation for pairs of relevant points, ( $P_0$ , in %) |              |              |               |
|--------------------|--------------------|-------|-----------------------------------------------------------|--------------|--------------|---------------|
|                    |                    |       | tip/forceps2                                              | tip/tendon   | base/tibia   | tendons 1/2   |
| <i>Calosoma</i>    | <b>movie1_Inq</b>  | 171   | 0.389 (<0.1)                                              |              | 0.361 (<0.1) | 0.317 (<1)    |
| <i>Lethrus</i>     | Leth1C             | 37    | 0.705 (<0.1)                                              |              | -0.044 (ns)  | -0.398 (<1)   |
|                    | Leth1A             | 58    | 0.241 (ns)                                                |              | 0.023 (ns)   | -0.021 (ns)   |
|                    | Leth1B             | 27    | 0.857 (<0.1)                                              |              | -0.258 (ns)  | -0, 145 (ns)  |
|                    | Leth2B             | 32    | 0.504 (<1)                                                |              | -0.004 (ns)  | 0.186 (ns)    |
|                    | Leth2A             | 34    | 0.497 (<1)                                                | 0.491 (<1)   |              |               |
|                    | <b>movie2_Leth</b> | 58    | 0.195 (ns)                                                | 0.523 (<0.1) |              |               |
|                    | Leth3A             | 99    | 0.663 (<0.1)                                              |              | -0.048 (ns)  | -0.198 (<5)   |
| <i>Pentodon</i>    | <b>movie3_Pen</b>  | 170   | 0.898 (<0.1)                                              | 0.824 (<0.1) | 0.556 (<0.1) |               |
|                    | Pent2R1 **         | 83    | 0.032 (ns)                                                |              |              |               |
| <i>Chalcophora</i> | <b>movie4_Chal</b> | 104   | 0.706 (<0.1)                                              | 0.781 (<0.1) | 0.732 (<0.1) | -0.635 (<0.1) |

Abbreviations: D.O.F. degrees of freedom, ns non-significant,  $P_0$  probability of the null hypothesis.

\*Movies, available at the Website (<http://izan.kiev.ua/ppages/frantsevich/arc.htm>), are printed bold.

\*\* Vague performance of the arculum in the specimen filmed in Pent2R1.avi was caused by broad light reflexion around the fine forceps, which rendered poor localization of the relevant point.

**Fig. S3.**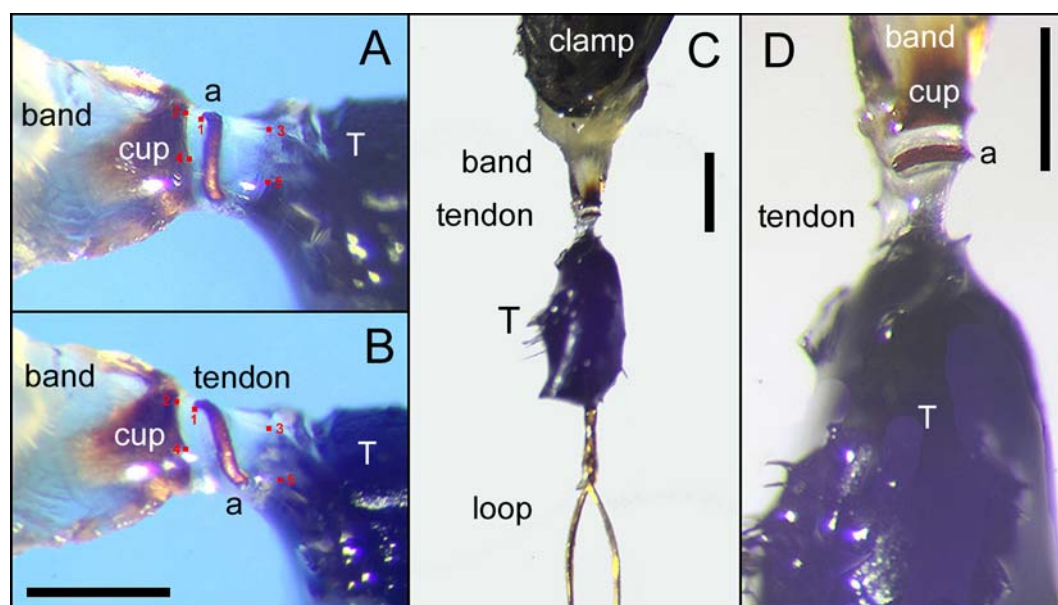

**Evaluation of strain in the MET tendon of *Lethrus apterus*.** (A) Neutral state of the MET tendon and the arculum in a micromanipulator between a clamp holding the MET apodeme and an unstrained spring holding the tibia. (B) The same specimen is stretched via the spring until the arculum turns to the limit. Relevant points for measurements: 1 base of the arculum; 2, 3 marks of the tendon length at the dorsal side; 4, 5 same at the ventral side. (C) A specimen of the MET apodeme, the tendon and a piece of the tibia hangs between a clamp and a wire loop to which various weights are suspended. (D) Magnified image of the tendon and the arculum in the same specimen. Scale bars: (A, B; D) 0.5 mm, (C) 1 mm. Abbreviation: a arculum, T tibia. View reference points at magnification 200 %.
